# Supplementary material for: Deficits in Cerebellum-Dependent Learning and Cerebellar Morphology in Male and Female BTBR Autism Model Mice
Source: NeuroSci. 2022 Nov 9;3(4):624–44. doi: 10.3390/neurosci3040045 (PMC10292658; doi:10.3390/neurosci3040045)
Supplement: Supplementary file 1 [file neurosci-03-00045-s001.zip › Statistical analysis.xlsx]

## Sheet: Figure 1
Panels	Statistical test	Factors	Test statistics and p-values	*	Comparisons	Adjusted p-values	*
A	Two-way ANOVA with repeated measurements	Training Session	F(1,14) = 0.05723, p = 0.8143		test day 1, C57 - BTBR	p < 0.0001	****
		Strain	F(1,14) = 63.40, p < 0.0001	****	test day 2, C57 - BTBR	p < 0.0001	****
		Training Session x Strain	F(1,14) = 0.5336, p = 0.5841
B	Two-way ANOVA with repeated measurements	Training Session	F(1,14) = 0.4914, p = 0.4948		test day 1, C57 - BTBR	p = 0.0824
		Strain	F(1,14) = 8.779, p = 0.0103	*	test day 2, C57 - BTBR	p = 0.0105	*
		Training Session x Strain	F(1,14) = 0.8165, p = 0.3815
C	MIxed effects analysis with repeated measures	Training Session	F(5.324, 113.2) = 54.41, p < 0.0001	****	test day 1, C57 - BTBR	p > 0.9999
		Strain	F(1,23) = 19.07, p = 0.0002	***	test day 2, C57 - BTBR	p > 0.9999
		Training Session x Strain	F(11,234) = 5.902, p < 0.0001	****	test day 3, C57 - BTBR	p > 0.9999
					test day 4, C57 - BTBR	p > 0.9999
					test day 5, C57 - BTBR	p > 0.9999
					test day 6, C57 - BTBR	p > 0.9999
					test day 7, C57 - BTBR	p > 0.9999
					test day 8, C57 - BTBR	p = 0.0353	*
					test day 9, C57 - BTBR	p = 0.1204
					test day 10, C57 - BTBR	p = 0.0090	**
					test day 11, C57 - BTBR	p = 0.9863
					test day 12, C57 - BTBR	p = 0.0018	**
D	Student's two-sample unpaired t-test	-	t(23) = 4.109, p = 0.0004	***	-	-
E	Student's two-sample unpaired t-test	-	t(23) = 0.1017, p = 0.9198		-	-
G	Mixed effects analysis with repeated measures	Training Session	F(3.399,70.75) = 61.57, p < 0.0001	****	-	-
		Strain	F(1,21) = 1.381, p = 0.2531		-	-
		Training Session x Strain	F(11,177) = 1.174, p = .0378		-	-
F	Student's two-sample unpaired t-test	-	t(21) = 0.7287, p = 0.4743		-	-
H	Student's two-sample unpaired t-test	-	t(21) = 0.6609, p = 0.5155		-	-

## Sheet: Figure 2
61.5	Statistical test	Factors	Test statistics and p-values	*	Comparisons	Adjusted p-values	*
A	Student's unpaired two-tailed t-test	-	t(20) = 0.6723, p = 0.5091		-	-
C	Student's unpaired two-tailed t-test	-	t(14) = 4.609, p = 0.0004		-	-
D	Two-way ANOVA	Strain	F(1,42) = 27.27, p < 0.0001	****	C57 vs. BTBR: MCL	p = 0.0004	***
		Layer	F(2,42) = 410.9, p < 0.0001	****	C57 vs. BTBR: GCL	p = 0.0098	**
		Strain x Layer	F(2,42) = 1.507, p = 0.2334		C57 vs. BTBR: WM	p = 0.2697
E	Student's unpaired two-tailed t-test	-	t(12) = 11.52, p < 0.0001	****	-
F	Two-way ANOVA	Strain	F(1,112) = 29.65, p < 0.0001	****	C57 vs. BTBR: I/II	p = 0.0012	**
		Lobule	F(7,112) = 87.92, p < 0.0001	****	C57 vs. BTBR: III	p > 0.9999
		Strain x Lobule	F(1,112) = 1.738, p = 0.1071		C57 vs. BTBR: IV/V	p = 0.0037	**
					C57 vs. BTBR: VI	p > 0.9999
					C57 vs. BTBR: VII	p > 0.9999
					C57 vs. BTBR: VIII	p > 0.9999
					C57 vs. BTBR: IX	p = 0.0396	*
					C57 vs. BTBR: X	p > 0.9999
G	Two-way ANOVA	Strain	F(1,112) = 23.26, p < 0.0001	****	C57 vs. BTBR: I/II	p = 0.0083	**
		Lobule	F(7,112) = 78.31, p < 0.0001	****	C57 vs. BTBR: III	p > 0.9999
		Strain x Lobule	F(7,112) = 1.448, p = 0.1935		C57 vs. BTBR: IV/V	p = 0.0101	*
					C57 vs. BTBR: VI	p > 0.9999
					C57 vs. BTBR: VII	p > 0.9999
					C57 vs. BTBR: VIII	p > 0.9999
					C57 vs. BTBR: IX	p = 0.0753
					C57 vs. BTBR: X	p > 0.9999
H	Two-way ANOVA	Strain	F(1,112) = 20.20, p < 0.0001	****	C57 vs. BTBR: I/II	p = 0.0015	**
		Lobule	F(7,112) = 76.95, p < 0.0001	****	C57 vs. BTBR: III	p > 0.9999
		Strain x Lobule	F(7,112) = 1.202, p = 0.3077		C57 vs. BTBR: IV/V	p > 0.9999
					C57 vs. BTBR: VI	p > 0.9999
					C57 vs. BTBR: VII	p > 0.9999
					C57 vs. BTBR: VIII	p > 0.9999
					C57 vs. BTBR: IX	p = 0.0880
					C57 vs. BTBR: X	p > 0.9999
I	Two-way ANOVA	Strain	F(7,96) = 76.45, p < 0.0001	****	C57 vs. BTBR: I/II	p = 0.0076	**
		Lobule	F(7,96) = 10.17, p < 0.0001	****	C57 vs. BTBR: III	p > 0.9999
		Strain x Lobule	F(7,96) = 8.922, p < 0.0001	****	C57 vs. BTBR: IV/V	p < 0.0001	****
					C57 vs. BTBR: VI	p < 0.0001	****
					C57 vs. BTBR: VII	p = 0.0004	***
					C57 vs. BTBR: VIII	p > 0.9999
					C57 vs. BTBR: IX	p = 0.7305
					C57 vs. BTBR: X

## Sheet: Figure 3
Panels	Statistical test	Factors	Test statistics and p-values	*	Comparisons	Adjusted p-values	*
A	Student's unpaired two-tailed t-test	-	t(14) = 0.2292, p = 0.8221		-	-
C	Student's unpaired two-tailed t-test	-	t(10) = 10.97, p < 0.0001	****	-	-
D	Two-way ANOVA	Strain	F(1,30) = 116.3, p < 0.0001	****	C57 vs. BTBR: MCL	p < 0.0001	****
		Layer	F(2,30) = 699.8, p < 0.0001	****	C57 vs. BTBR: GCL	p < 0.0001	**
		Strain x Layer	F(2,30) = 10.70, p = 0.0003	***	C57 vs. BTBR: WM	p = 0.0284	*
E	Student's unpaired two-tailed t-test	-	t(10) = 8.497, p < 0.0001	****	-	-
F	Two-way ANOVA	Strain	F(1,80) = 80.88, p < 0.0001	****	C57 vs. BTBR: I/II	p < 0.0001	****
		Lobule	F(7,80) = 124.5, p < 0.0001	****	C57 vs. BTBR: III	p = 0.0331	*
		Strain x Lobule	F(7,80) = 3.121, p = .0058	**	C57 vs. BTBR: IV/V	p < 0.0001	****
					C57 vs. BTBR: VI	p = 0.0008	***
					C57 vs. BTBR: VII	p > 0.9999
					C57 vs. BTBR: VIII	p = 0.7207
					C57 vs. BTBR: IX	p = 0.0033	**
					C57 vs. BTBR: X	p = 0.2118
G	Two-way ANOVA	Strain	F(1,79) = 84.71, p < 0.0001	****	C57 vs. BTBR: I/II	p < 0.0001	****
		Lobule	F(7,79) = 117.7, p < 0.0001	****	C57 vs. BTBR: III	p = 0.2360
		Strain x Lobule	F(7,79) = 3.187, p = 0.0051	****	C57 vs. BTBR: IV/V	p < 0.0001	****
					C57 vs. BTBR: VI	p < 0.0001	****
					C57 vs. BTBR: VII	p > 0.9999
					C57 vs. BTBR: VIII	p = 0.4188
					C57 vs. BTBR: IX	p = 0.0020	**
					C57 vs. BTBR: X	p = 0.6914
H	Two-way ANOVA	Strain	F(1,79) = 63.59, p < 0.0001	****	C57 vs. BTBR: I/II	p < 0.0001	****
		Lobule	F(7,79) = 93.67, p < 0.0001	****	C57 vs. BTBR: III	p = 0.0073	**
		Strain x Lobule	F(7,79) = 2.046, p = 0.0594		C57 vs. BTBR: IV/V	p = 0.0090	**
					C57 vs. BTBR: VI	p = 0.1099
					C57 vs. BTBR: VII	p > 0.9999
					C57 vs. BTBR: VIII	p > 0.9999
					C57 vs. BTBR: IX	p = 0.0277
					C57 vs. BTBR: X	p = 0.0906
H	Two-way ANOVA	Strain	F(1,80) = 42.63, p < 0.0001	****	C57 vs. BTBR: I/II	p < 0.0001	****
		Lobule	F(7,80) = 26.99, p < 0.0001	****	C57 vs. BTBR: III	p > 0.9999
		Strain x Lobule	F(7,80) = 5.940, p < 0.0001	****	C57 vs. BTBR: IV/V	p = 0.0008	***
					C57 vs. BTBR: VI	p < 0.0001	****
					C57 vs. BTBR: VII	p > 0.9999
					C57 vs. BTBR: VIII	p > 0.9999
					C57 vs. BTBR: IX	p > 0.9999
					C57 vs. BTBR: X	p > 0.9999

## Sheet: Figure 4
Panels	Statistical test	Factors	Test statistics and p-values	*	Comparisons	Adjusted p-values	*
B	Two-way ANOVA	Strain	F(1,103) = 4.497, p = 0.0363	*	C57 vs. BTBR: I/II	p > 0.9999
		Lobule	F(7,103) = 1.772, p = 0.1007		C57 vs. BTBR: III	p = 0.7739
		Strain x Lobule	F(7,103) = 0.7876, p = 0.5992		C57 vs. BTBR: IV/V	p = 0.4453
					C57 vs. BTBR: VI	p = 0.9523
					C57 vs. BTBR: VII	p > 0.9999
					C57 vs. BTBR: VIII	p > 0.9999
					C57 vs. BTBR: IX	p > 0.9999
					C57 vs. BTBR: X	p > 0.9999
C	Two-way ANOVA	Strain	F(1,78) = 7.085, p = 0.0094	**	C57 vs. BTBR: I/II	p = 0.9248
		Lobule	F(7,78) = 3.235, p = 0.0046	**	C57 vs. BTBR: III	p > 0.9999
		Strain x Lobule	F(7,78) = 0.8670, p = 0.5364		C57 vs. BTBR: IV/V	p = 0.8952
					C57 vs. BTBR: VI	p > 0.9999
					C57 vs. BTBR: VII	p > 0.9999
					C57 vs. BTBR: VIII	p = 0.9854
					C57 vs. BTBR: IX	p = 0.0548
					C57 vs. BTBR: X	p = 0.6865

## Sheet: Figure 5
Panels	Statistical test	Factors	Test statistics and p-values	*	Comparisons	Adjusted p-values	*
B	Two-way ANOVA with repeated measures	Strain	F(1,33) = 0.2126, p = 0.6478		C57 - BTBR, concentric circle 1	>0.9999
		Distance from Soma	F(3.335, 110.1) = 38.68, p < 0.0001	****	C57 - BTBR, concentric circle 2	>0.9999
		Strain x Distance from Soma	F(19,627) = 0.8372, p = 0.6625		C57 - BTBR, concentric circle 3	>0.9999
					C57 - BTBR, concentric circle 4	>0.9999
					C57 - BTBR, concentric circle 5	>0.9999
					C57 - BTBR, concentric circle 6	>0.9999
					C57 - BTBR, concentric circle 7	>0.9999
					C57 - BTBR, concentric circle 8	>0.9999
					C57 - BTBR, concentric circle 9	>0.9999
					C57 - BTBR, concentric circle 10	>0.9999
					C57 - BTBR, concentric circle 11	>0.9999
					C57 - BTBR, concentric circle 12	>0.9999
					C57 - BTBR, concentric circle 13	>0.9999
					C57 - BTBR, concentric circle 14	>0.9999
					C57 - BTBR, concentric circle 15	>0.9999
					C57 - BTBR, concentric circle 16	>0.9999
					C57 - BTBR, concentric circle 17	>0.9999
					C57 - BTBR, concentric circle 18	>0.9999
					C57 - BTBR, concentric circle 19	>0.9999
					C57 - BTBR, concentric circle 20	>0.9999
C	Student's unpaired two-tailed t-test	-	t(29) = 1.695, p = 0.1008		-	-
D	Student's unpaired two-tailed t-test	-	t(29) = 0.6551, p = 0.5175		-	-
E	Student's unpaired two-tailed t-test	-	t(50) = 3.117, p = 0.0030	**	-	-
F	Two-way ANOVA with repeated measures	Strain	F(1,38) = 6.375, p = 0.0159	*	C57 - BTBR, concentric circle 1	>0.9999
		Distance from Soma	F(2.793,106.1) = 87.85, p < 0.0001	****	C57 - BTBR, concentric circle 2	>0.9999
		Strain x Distance	F(30,1140) = 0.8429, p = 0.7095		C57 - BTBR, concentric circle 3	>0.9999
					C57 - BTBR, concentric circle 4	>0.9999
					C57 - BTBR, concentric circle 5	>0.9999
					C57 - BTBR, concentric circle 6	>0.9999
					C57 - BTBR, concentric circle 7	>0.9999
					C57 - BTBR, concentric circle 8	>0.9999
					C57 - BTBR, concentric circle 9	>0.9999
					C57 - BTBR, concentric circle 10	>0.9999
					C57 - BTBR, concentric circle 11	>0.9999
					C57 - BTBR, concentric circle 12	>0.9999
					C57 - BTBR, concentric circle 13	>0.9999
					C57 - BTBR, concentric circle 14	>0.9999
					C57 - BTBR, concentric circle 15	>0.9999
					C57 - BTBR, concentric circle 16	>0.9999
					C57 - BTBR, concentric circle 17	>0.9999
					C57 - BTBR, concentric circle 18	>0.9999
					C57 - BTBR, concentric circle 19	>0.9999
					C57 - BTBR, concentric circle 20	>0.9999
					C57 - BTBR, concentric circle 21	>0.9999
					C57 - BTBR, concentric circle 22	>0.9999
					C57 - BTBR, concentric circle 23	>0.9999
					C57 - BTBR, concentric circle 24	0.9881
					C57 - BTBR, concentric circle 25	>0.9999
					C57 - BTBR, concentric circle 26	>0.9999
					C57 - BTBR, concentric circle 27	>0.9999
					C57 - BTBR, concentric circle 28	>0.9999
					C57 - BTBR, concentric circle 29	>0.9999
					C57 - BTBR, concentric circle 30	>0.9999
					C57 - BTBR, concentric circle 31	>0.9999
G	Student's unpaired two-tailed t-test	-	t(40) = 1.896, p = 0.0652		-	-
H	Student's unpaired two-tailed t-test	-	t(40) = 1.229, p = 0.2261		-	-
I	Student's unpaired two-tailed t-test	-	t(28) = 7.435, p < 0.0001	****	-	-

## Sheet: Supplementary Figure 2
Panels	Statistical test	Factors	Test statistics and p-values	*	Comparisons	Adjusted p-values	*
A	Two-way ANOVA	Strain	F(1,28) = 1.632, p = 0.2120
		Area	F(1,28) = 37.93, p < 0.0001	****
		Strain x Area	F(1,28) = 0.0001904, p = 0.9891
B	Two-way ANOVA	Strain	F(1,112) = 1.433, p = 0.2337
		Lobule	F(7,112) = 10.38, p < 0.0001	****
		Strain x Lobule	F(7,112) = 0.09220, p = 0.9986
C	Two-way ANOVA	Strain	F(1,112) = 0.1674, p = 0.6832
		Lobule	F(7,112) = 10.57, p < 0.0001	****
		Strain x Lobule	F(7,112) = 1.669, p = 0.1238
D	Two-way ANOVA	Strain	F(1,20) = 4.445, p = 0.0478	*	MCL, C57 - BTBR	p = 0.0835
		Area	F(1,20) = 22.99, p = 0.0001	****	GCL, C57 - BTBR	p = 0.8596
		Strain x Area	F(1,20) = 0.9381, p = 0.3443
E	Two-way ANOVA	Strain	F(1,79) = 11.77, p = 0.0010	***	lobule I/II, C57 - BTBR	p > 0.9999
		Lobule	F(7,79) = 29.68, p < 0.0001	****	lobule III, C57 - BTBR	p > 0.9999
		Strain x Lobule	F(7,79) = 2.041, p = 0.0600		lobule IV/V, C57 - BTBR	p = 0.1239
					lobule VI, C57 - BTBR	p = 0.0054	**
					lobule VII, C57 - BTBR	p > 0.9999
					lobule VIII, C57 - BTBR	p = 0.7227
					lobule IX, C57 - BTBR	p > 0.9999
					lobule X, C57 - BTBR	p > 0.9999
F	Two-way ANOVA	Strain	F(1,79) = 2.969, p = 0.0880
		Lobule	F(7,79) = 42.37, p < 0.0001	****
		Strain x Lobule	F(7,79) = 1.632, p = 0.1386

## Sheet: Supplementary Figure 3
Panels	Statistical test	Factors	Test statistics and p-values	*	Comparisons	Adjusted p-values	*
A	Two-way ANOVA	Strain	F(1,28) = 30.98, p < 0.0001	****	C57-M vs. C57-F	p = 0.9997
		Sex	F(1,28) = 3.902, p = 0.0582		C57-M vs. BTBR-M	p = 0.0002	***
		Strain x Sex	F(1,28) = 2.275, p = 0.1427		C57-M vs. BTBR-F	p = 0.0975
					C57-F vs. BTBR-M	p < 0.0001	****
					C57-F vs. BTBR-F	p = 0.0456	*
					BTBR-M vs. BTBR-F	p = 0.1151
B	Two-way ANOVA	Strain	F(1,28) = 32.79, p < 0.0001	****	C57-M vs. C57-F	p > 0.9999
		Sex	F(1,28) = 1.038, p = 0.3170		C57-M vs. BTBR-M	p = 0.0004	***
		Strain x Sex	F(1,28) = 0.6921, p = 0.4125		C57-M vs. BTBR-F	p = 0.0148	*
					C57-F vs. BTBR-M	p = 0.0003	***
					C57-F vs. BTBR-F	p = 0.0104	*
					BTBR-M vs. BTBR-F	p = 0.7403
C	Two-way ANOVA	Strain	F(1,42) = 6.858, p = 0.0122	*	C57-M vs. C57-F	p = 0.9494
		Sex	F(1,42) = 2.389, p = 0.1297		C57-M vs. BTBR-M	p = 0.0016	**
		Strain x Sex	F(1,42) = 7.693, p = 0.0082	**	C57-M vs. BTBR-F	p = 0.9698
					C57-F vs. BTBR-M	p = 0.0367	*
					C57-F vs. BTBR-F	p > 0.9999
					BTBR-M vs. BTBR-F	p = 0.0225	*
D	Two-way ANOVA	Strain	F(1,46) = 0.3120, p = 0.5792		C57-M vs. C57-F	p = 0.6033
		Sex	F(1,46) = 3.797, p = 0.0574		C57-M vs. BTBR-M	p > 0.9999
		Strain x Sex	F(1,46) = 0.1775, p = 0.6755		C57-M vs. BTBR-F	p > 0.9999
					C57-F vs. BTBR-M	p = 0.4972
					C57-F vs. BTBR-F	p > 0.9999
					BTBR-M vs. BTBR-F	p > 0.9999
E	Two-way ANOVA	Strain	F(1,34) = 0.3021, p = 0.5862		C57-M vs. C57-F	p > 0.9999
		Sex	F(1,34) = 0.2102, p = 0.6495		C57-M vs. BTBR-M	p = 0.9966
		Strain x Sex	F(1,34) = 0.01059, p = 0.9187		C57-M vs. BTBR-F	p > 0.9999
					C57-F vs. BTBR-M	p = 0.9850
					C57-F vs. BTBR-F	p = 0.9999
					BTBR-M vs. BTBR-F	p = 0.9985
F	Two-way ANOVA	Strain	F(1,24) = 95.65, p < 0.0001	****	C57-M vs. C57-F	p > 0.9999
		Sex	F(1,24) = 9.986, p = 0.0042	**	C57-M vs. BTBR-M	p = 0.0001	***
		Strain x Sex	F(1,24) = 8.476, p = 0.0077	**	C57-M vs. BTBR-F	p < 0.0001	****
					C57-F vs. BTBR-M	p = 0.0006	***
					C57-F vs. BTBR-F	p < 0.0001	****
					BTBR-M vs. BTBR-F	p = 0.0015	**
G	Two-way ANOVA	Strain	F(1,22) = 197.9, p < 0.0001	****	C57-M vs. C57-F	p = 0.2967
		Sex	F(1,22) = 0.9259, p = 0.3464		C57-M vs. BTBR-M	p < 0.0001	****
		Strain x Sex	F(1,22) = 3.529, p = 0.0736		C57-M vs. BTBR-F	p < 0.0001	****
					C57-F vs. BTBR-M	p < 0.0001	****
					C57-F vs. BTBR-F	p < 0.0001	****
					BTBR-M vs. BTBR-F	p = 0.9883
H	Two-way ANOVA	Strain	F(1,23) = 5.655, p = 0.0261	*	C57-M vs. C57-F	p > 0.9999
		Sex	F(1,23) = 2.546, p = 0.1243		C57-M vs. BTBR-M	p = 0.6852
		Strain x Sex	F(1,23) = 0.03459, p = 0.8541		C57-M vs. BTBR-F	p > 0.9999
					C57-F vs. BTBR-M	p = 0.0655
					C57-F vs. BTBR-F	p = 0.5913
					BTBR-M vs. BTBR-F	p > 0.9999
I	Two-way ANOVA	Strain	F(1,67) = 0.1362, p = 0.7133		C57-M vs. C57-F	p = 0.0010	**
		Sex	F(1,67) = 10.90, p = 0.0015	**	C57-M vs. BTBR-M	p = 0.3546
		Strain x Sex	F(1,67) = 6.289, p = 0.0146	*	C57-M vs. BTBR-F	p = 0.0636
					C57-F vs. BTBR-M	p = 0.2674
					C57-F vs. BTBR-F	p = 0.6669
					BTBR-M vs. BTBR-F	p > 0.9999
J	Two-way ANOVA	Strain	F(1,67) = 1.378, p = 0.2446		C57-M vs. C57-F	p < 0.0001	****
		Sex	F(1,67) = 56.58, p < 0.0001	****	C57-M vs. BTBR-M	p > 0.9999
		Strain x Sex	F(1,67) = 0.05293, p = 0.8187		C57-M vs. BTBR-F	p < 0.0001	****
					C57-F vs. BTBR-M	p = 0.0002	***
					C57-F vs. BTBR-F	p > 0.9999
					BTBR-M vs. BTBR-F	p < 0.0001	****
K	Two-way ANOVA	Strain	F(1,78) = 31.28, p < 0.0001	****	C57-M vs. C57-F	p = 0.8803
		Sex	F(1,78) = 6.953, p = 0.0101	*	C57-M vs. BTBR-M	p = 0.0028	**
		Strain x Sex	F(1,78) = 1.358, p = 0.2474		C57-M vs. BTBR-F	p < 0.0001	****
					C57-F vs. BTBR-M	p = 0.2232
					C57-F vs. BTBR-F	p = 0.0004	***
					BTBR-M vs. BTBR-F	p = 0.0541
